# Supplementary material for: Synthesis, crystal structure and magnetic properties of octanuclear Ni4Ln4 complexes constructed using a Schiff base ligand and di-2-pyridyl ketone
Source: Royal Society of Chemistry journal article supplement (doi:10.1039/d3nj05343a), 2024-01-01
Supplement: d3nj05343a1.pdf [file d3nj05343a1.pdf]

## Electronic Supplementary Information (ESI)

for *NJC*

### Synthesis, crystal structure and magnetic properties of octanuclear $\text{Ni}_4\text{Ln}_4$ complexes constructed by Schiff base ligand and di-2-pyridyl ketone†

Yu-Jie Zhu,<sup>a</sup> Hui-Sheng Wang,<sup>\*a</sup> Yuxiang Chen,<sup>\*b</sup> Pengfei Zhou,<sup>a</sup> Yanfang Wu<sup>c</sup> and Yi-Quan Zhang<sup>\*d</sup>

<sup>a</sup> School of Chemistry and Environmental Engineering, Key Laboratory of Green Chemical Process of Ministry of Education, Hubei Key Laboratory of Novel Reactor and Green Chemical Technology, Wuhan Institute of Technology, Wuhan 430074, P. R. China.

<sup>b</sup> School of Pharmaceutical and Chemical Engineering, Taizhou University, Taizhou 318000, P.R. China.

<sup>c</sup> School of Energy and Mechanical Engineering, Jiangxi University of Science and Technology, Nanchang 330013, P. R. China.

<sup>d</sup> Jiangsu Key Laboratory for NSLSCS, School of Physical Science and Technology, Nanjing Normal University, Nanjing 210023, P.R. China

\***E-mail:** wangch198201@163.com (H. S. Wang), cyx@tzc.edu.cn (Y. Chen), zhangyiquan@njnu.edu.cn (Y.Q. Zhang).

**Table S1.** Crystallographic data for complexes **1-3**

| Complexes                                                           | 1                                                                                 | 2                                                                       | 3                                                                                                |
|---------------------------------------------------------------------|-----------------------------------------------------------------------------------|-------------------------------------------------------------------------|--------------------------------------------------------------------------------------------------|
| Formula <sup>a</sup>                                                | C <sub>126</sub> H <sub>166</sub> Dy <sub>4</sub> N <sub>20</sub> Ni <sub>4</sub> | C <sub>126</sub> H <sub>164</sub> Dy <sub>0.09</sub> N <sub>20</sub> Ni | C <sub>126</sub> H <sub>162</sub> N <sub>20</sub> Ni <sub>4</sub> O <sub>53</sub> Y <sub>4</sub> |
|                                                                     | O <sub>55</sub>                                                                   | 4O <sub>54</sub> Y <sub>3.91</sub>                                      |                                                                                                  |
| Formula weight <sup>a</sup>                                         | 3725.54                                                                           | 3419.77                                                                 | 3395.13                                                                                          |
| Crystal color                                                       | yellow                                                                            | yellow                                                                  | yellow                                                                                           |
| Crystal size (mm) <sup>3</sup>                                      | 0.13 × 0.10 × 0.07                                                                | 0.26 × 0.23 × 0.19                                                      | 0.27 × 0.24 × 0.21                                                                               |
| Crystal system                                                      | monoclinic                                                                        | monoclinic                                                              | monoclinic                                                                                       |
| Space group                                                         | <i>C2/c</i>                                                                       | <i>C2/c</i>                                                             | <i>C2/c</i>                                                                                      |
| <i>a</i> (Å)                                                        | 48.1535(19)                                                                       | 48.0558(15)                                                             | 48.1240(17)                                                                                      |
| <i>b</i> (Å)                                                        | 19.3949(8)                                                                        | 19.4125(6)                                                              | 19.4411(7)                                                                                       |
| <i>c</i> (Å)                                                        | 15.7658(5)                                                                        | 15.7368(4)                                                              | 15.7458(7)                                                                                       |
| <i>α</i> (°)                                                        | 90                                                                                | 90                                                                      | 90                                                                                               |
| <i>β</i> (°)                                                        | 99.221(2)                                                                         | 99.2650(10)                                                             | 99.3450(10)                                                                                      |
| <i>γ</i> (°)                                                        | 90                                                                                | 90                                                                      | 90                                                                                               |
| Unit cell volume (Å <sup>3</sup> )                                  | 14533.9(10)                                                                       | 14489.1(7)                                                              | 14536.0(10)                                                                                      |
| <i>T</i> (K)                                                        | 173(2)                                                                            | 172(2)                                                                  | 173(2)                                                                                           |
| <i>Z</i>                                                            | 4                                                                                 | 4                                                                       | 4                                                                                                |
| Radiation type                                                      | Mo/ <i>Kα</i>                                                                     | Mo/ <i>Kα</i>                                                           | Mo/ <i>Kα</i>                                                                                    |
| Wavelength (Å)                                                      | 0.71073                                                                           | 0.71073                                                                 | 0.71073                                                                                          |
| <i>μ</i> (mm <sup>-1</sup> )                                        | 2.607                                                                             | 2.173                                                                   | 2.155                                                                                            |
| <i>D<sub>c</sub></i> (g cm <sup>-3</sup> )                          | 1.449                                                                             | 1.322                                                                   | 1.314                                                                                            |
| <i>θ</i> range                                                      | 2.71 ~ 25.34                                                                      | 2.62 ~ 25.31                                                            | 2.62 ~ 25.35                                                                                     |
| Index ranges                                                        | -57 ≤ <i>h</i> ≤ 55<br>-23 ≤ <i>k</i> ≤ 23<br>-18 ≤ <i>l</i> ≤ 17                 | -57 ≤ <i>h</i> ≤ 57<br>-21 ≤ <i>k</i> ≤ 23<br>-18 ≤ <i>l</i> ≤ 18       | -57 ≤ <i>h</i> ≤ 57<br>-23 ≤ <i>k</i> ≤ 23<br>-18 ≤ <i>l</i> ≤ 18                                |
| <i>F</i> (000)                                                      | 6272                                                                              | 5850                                                                    | 5840                                                                                             |
| Reflections collected                                               | 34331                                                                             | 53553                                                                   | 41532                                                                                            |
| Unique reflections [ <i>R</i> <sub>int</sub> ]                      | 12663 [0.0755]                                                                    | 12702                                                                   | 12758 [0.0706]                                                                                   |
| Reflections with <i>I</i> > 2σ( <i>I</i> )                          | 7866                                                                              | 8842                                                                    | 8659                                                                                             |
| Restraints/parameters                                               | 0/799                                                                             | 0/805                                                                   | 0/798                                                                                            |
| Final <i>R</i> indexes [ <i>I</i> >= 2σ( <i>I</i> )] <sup>b,c</sup> | <i>R</i> <sub>1</sub> = 0.0616, <i>wR</i> <sub>2</sub> = 0.1525                   | <i>R</i> <sub>1</sub> = 0.0565, <i>wR</i> <sub>2</sub> = 0.1628         | <i>R</i> <sub>1</sub> = 0.0594, <i>wR</i> <sub>2</sub> = 0.1775                                  |
| Final <i>R</i> indexes [all data]                                   | <i>R</i> <sub>1</sub> = 0.1201, <i>wR</i> <sub>2</sub> = 0.1698                   | <i>R</i> <sub>1</sub> = 0.0989, <i>wR</i> <sub>2</sub> = 0.1832         | <i>R</i> <sub>1</sub> = 0.1010, <i>wR</i> <sub>2</sub> = 0.1976                                  |
| <i>S</i> (all data)                                                 | 1.099                                                                             | 1.099                                                                   | 1.098                                                                                            |
| (Δρ) <sub>max,min</sub> /e Å <sup>-3</sup>                          | 2.934 and -2.694                                                                  | 1.932 and -0.734                                                        | 1.947 and -0.801                                                                                 |

<sup>a</sup> The formula and the formula weights include the solvent molecules which were subtracted by SQUEEZE program.

<sup>b</sup>  $R_1 = \Sigma (||F_o| - |F_c||) / \Sigma |F_o|$ ,  $wR_2 = [ \Sigma [w (F_o^2 - F_c^2)^2] / \Sigma [w (F_o^2)^2] ]^{0.5}$ ,  $w = 1 / [\sigma^2(F_o^2) + [(ap)^2 + bp]$ , where  $p = [\max(F_o^2, 0) + 2F_c^2] / 3$ .

**Table S2.** Selected bond lengths (Å) and angles (°) for **1**.

| Selected bond lengths for <b>1</b> |            |                                      |           |                                      |          |
|------------------------------------|------------|--------------------------------------|-----------|--------------------------------------|----------|
| Dy1-O2                             | 2.184(6)   | Dy2-O10                              | 2.382(5)  | Ni1-O4 <sup>i</sup>                  | 2.080(6) |
| Dy1-O5                             | 2.265(6)   | Dy2-O14                              | 2.380(6)  | Ni1-O1                               | 2.074(5) |
| Dy1-O14                            | 2.342(5)   | Dy2-O15                              | 2.376(7)  | Ni1-O1 <sup>i</sup>                  | 2.111(5) |
| Dy1-O10                            | 2.391(6)   | Dy2-O16                              | 2.378(8)  | Ni2-O7                               | 2.058(7) |
| Dy1-O4                             | 2.446(5)   | Dy2-N10                              | 2.506(8)  | Ni2-O8                               | 2.053(6) |
| Dy1-O1                             | 2.459(5)   | Dy2-O9                               | 2.529(6)  | Ni2-O11                              | 2.059(7) |
| Dy1-N2                             | 2.480(6)   | Ni1-N4 <sup>i</sup>                  | 2.012(6)  | Ni2-N6                               | 2.029(8) |
| Dy1-O6                             | 2.542(5)   | Ni1-O13                              | 2.040(6)  | Ni2-N8                               | 2.154(8) |
| Dy2-O11                            | 2.293(7)   | Ni1-O5                               | 2.034(6)  | Ni2-N9                               | 2.073(8) |
| Dy2-O8                             | 2.283(7)   |                                      |           |                                      |          |
| Selected bond angles for <b>1</b>  |            |                                      |           |                                      |          |
| O2-Dy1-O5                          | 148.34(19) | O11-Dy2-O14                          | 104.5(2)  | O5-Ni1-O4 <sup>i</sup>               | 168.4(2) |
| O2-Dy1-O14                         | 121.5(2)   | O8-Dy2-O14                           | 145.9(2)  | N4 <sup>i</sup> -Ni1-O1              | 172.0(3) |
| O5-Dy1-O14                         | 80.6(2)    | O10-Dy2-O14                          | 66.01(18) | O13-Ni1-O1                           | 90.7(2)  |
| O2-Dy1-O10                         | 79.4(2)    | O14-Dy2-O15                          | 55.2(2)   | O5-Ni1-O1                            | 83.4(2)  |
| O5-Dy1-O10                         | 91.4(2)    | O11-Dy2-O16                          | 99.1(3)   | O4 <sup>i</sup> -Ni1-O1              | 105.6(2) |
| O14-Dy1-O10                        | 66.46(19)  | O8-Dy2-O16                           | 80.4(2)   | N4 <sup>i</sup> -Ni1-O1 <sup>i</sup> | 98.9(2)  |
| O2-Dy1-O4                          | 86.3(2)    | O10-Dy2-O16                          | 155.3(2)  | O13-Ni1-O1 <sup>i</sup>              | 170.8(2) |
| O5-Dy1-O4                          | 88.18(18)  | O14-Dy2-O16                          | 132.7(2)  | O1-Ni1-O1 <sup>i</sup>               | 81.2(2)  |
| O10-Dy1-O1                         | 135.88(18) | O15-Dy2-O16                          | 82.6(3)   | N6-Ni2-O7                            | 83.1(3)  |
| O5-Dy1-N2                          | 136.3(2)   | O11-Dy2-N10                          | 67.6(3)   | O11-Ni2-N8                           | 88.0(3)  |
| O14-Dy1-N2                         | 81.6(2)    | O8-Dy2-N10                           | 126.6(3)  | N6-Ni2-O8                            | 87.4(3)  |
| O10-Dy1-N2                         | 117.0(2)   | O10-Dy2-N10                          | 131.3(3)  | O7-Ni2-O8                            | 170.3(3) |
| O4-Dy1-N2                          | 81.2(2)    | O14-Dy2-N10                          | 78.9(3)   | N6-Ni2-O11                           | 168.9(3) |
| O5-Dy1-O6                          | 63.63(18)  | O11-Dy2-O9                           | 136.7(2)  | O7-Ni2-O11                           | 107.7(3) |
| O14-Dy1-O6                         | 126.76(18) | O8-Dy2-O9                            | 64.7(2)   | O8-Ni2-O11                           | 81.9(3)  |
| O4-Dy1-O6                          | 78.73(17)  | N10-Dy2-O9                           | 145.5(3)  | N6-Ni2-N9                            | 100.1(3) |
| O1-Dy1-O6                          | 124.48(19) | N4 <sup>i</sup> -Ni1-O13             | 89.8(2)   | O8-Ni2-N9                            | 93.3(3)  |
| N2-Dy1-O6                          | 151.0(2)   | N4 <sup>i</sup> -Ni1-O5              | 88.6(2)   | O11-Ni2-N9                           | 77.9(3)  |
| O11-Dy2-O8                         | 72.1(2)    | O13-Ni1-O5                           | 93.3(2)   | O8-Ni2-N8                            | 92.6(3)  |
| O11-Dy2-O10                        | 88.8(2)    | N4 <sup>i</sup> -Ni1-O4 <sup>i</sup> | 82.3(2)   | N9-Ni2-N8                            | 163.7(3) |

Symmetry code: <sup>i</sup>0.5 - x, 0.5 - y, 1 - z.

**Table S3.** Selected bond lengths (Å) and angles (°) for **3**.

| Selected bond lengths for <b>3</b> |            |                                      |            |                                      |            |
|------------------------------------|------------|--------------------------------------|------------|--------------------------------------|------------|
| Y1-O2                              | 2.170(4)   | Y2-O10                               | 2.349(4)   | Ni1-O4 <sup>i</sup>                  | 2.086(4)   |
| Y1-O5                              | 2.274(4)   | Y2-O14                               | 2.373(4)   | Ni1-O1                               | 2.066(4)   |
| Y1-O14                             | 2.312(4)   | Y2-O15                               | 2.358(4)   | Ni1-O1 <sup>i</sup>                  | 2.110(4)   |
| Y1-O10                             | 2.395(4)   | Y2-O16                               | 2.368(4)   | Ni2-O7                               | 2.062(5)   |
| Y1-O4                              | 2.416(4)   | Y2-N10                               | 2.498(5)   | Ni2-O8                               | 2.056(4)   |
| Y1-O1                              | 2.440(4)   | Y2-O9                                | 2.510(4)   | Ni2-O11                              | 2.066(4)   |
| Y1-N2                              | 2.470(4)   | Ni1-N4 <sup>i</sup>                  | 2.014(5)   | Ni2-N6                               | 2.035(5)   |
| Y1-O6                              | 2.540(4)   | Ni1-O13                              | 2.051(4)   | Ni2-N8                               | 2.151(5)   |
| Y2-O11                             | 2.270(4)   | Ni1-O5                               | 2.015(4)   | Ni2-N9                               | 2.077(5)   |
| Y2-O8                              | 2.271(4)   |                                      |            |                                      |            |
| Selected bond angles for <b>3</b>  |            |                                      |            |                                      |            |
| O2-Y1-O5                           | 147.60(14) | O11-Y2-O14                           | 104.17(14) | O5-Ni1-O4 <sup>i</sup>               | 167.47(15) |
| O2-Y1-O14                          | 121.56(14) | O8-Y2-O14                            | 146.08(14) | N4 <sup>i</sup> -Ni1-O1              | 171.49(17) |
| O5-Y1-O14                          | 80.93(13)  | O10-Y2-O14                           | 65.84(13)  | O13-Ni1-O1                           | 90.29(15)  |
| O2-Y1-O10                          | 78.93(14)  | O14-Y2-O15                           | 55.75(14)  | O5-Ni1-O1                            | 83.47(15)  |
| O5-Y1-O10                          | 91.89(13)  | O11-Y2-O16                           | 98.28(17)  | O4 <sup>i</sup> -Ni1-O1              | 105.87(14) |
| O14-Y1-O10                         | 66.06(13)  | O8-Y2-O16                            | 80.12(15)  | N4 <sup>i</sup> -Ni1-O1 <sup>i</sup> | 98.50(16)  |
| O2-Y1-O4                           | 86.17(14)  | O10-Y2-O16                           | 156.09(14) | O13-Ni1-O1 <sup>i</sup>              | 170.38(14) |
| O5-Y1-O4                           | 88.15(13)  | O14-Y2-O16                           | 132.96(15) | O1-Ni1-O1 <sup>i</sup>               | 81.20(15)  |
| O10-Y1-O1                          | 135.69(13) | O15-Y2-O16                           | 82.59(16)  | N6-Ni2-O7                            | 82.7(2)    |
| O5-Y1-N2                           | 136.72(14) | O11-Y2-N10                           | 67.14(16)  | O11-Ni2-N8                           | 87.94(18)  |
| O14-Y1-N2                          | 81.31(15)  | O8-Y2-N10                            | 126.73(15) | N6-Ni2-O8                            | 88.05(19)  |
| O10-Y1-N2                          | 115.91(14) | O10-Y2-N10                           | 130.07(16) | O7-Ni2-O8                            | 170.50(17) |
| O4-Y1-N2                           | 81.61(13)  | O14-Y2-N10                           | 78.28(15)  | N6-Ni2-O11                           | 169.0(2)   |
| O5-Y1-O6                           | 64.16(13)  | O11-Y2-O9                            | 137.28(14) | O7-Ni2-O11                           | 108.16(17) |
| O14-Y1-O6                          | 127.05(13) | O8-Y2-O9                             | 65.12(14)  | O8-Ni2-O11                           | 81.09(16)  |
| O4-Y1-O6                           | 78.74(12)  | N10-Y2-O9                            | 145.76(17) | N6-Ni2-N9                            | 101.3(2)   |
| O1-Y1-O6                           | 124.77(12) | N4 <sup>i</sup> -Ni1-O13             | 90.59(17)  | O8-Ni2-N9                            | 93.31(19)  |
| N2-Y1-O6                           | 150.72(15) | N4 <sup>i</sup> -Ni1-O5              | 88.03(17)  | O11-Ni2-N9                           | 77.97(18)  |
| O11-Y2-O8                          | 72.33(14)  | O13-Ni1-O5                           | 93.42(15)  | O8-Ni2-N8                            | 92.35(18)  |
| O11-Y2-O10                         | 88.63(15)  | N4 <sup>i</sup> -Ni1-O4 <sup>i</sup> | 82.49(16)  | N9-Ni2-N8                            | 163.8(2)   |

Symmetry code: <sup>i</sup>0.5 - x, 0.5 - y, 1 - z.

**Table S4.** Bond valence sum (BVS) calculations for determining of the protonation levels of the O atoms from the ligands in **1** and **3**.

| Atoms in <b>1</b> | BVS values of <b>1</b> | Atoms in <b>3</b> | BVS values of <b>3</b> |
|-------------------|------------------------|-------------------|------------------------|
| O1                | 2.04                   | O1                | 2.02                   |
| O2                | 2.03                   | O2                | 1.91                   |
| O3                | 1.95                   | O3                | 1.98                   |
| O4                | 1.87                   | O4                | 1.78                   |
| O5                | 2.08                   | O5                | 2.05                   |
| O6                | 2.08                   | O6                | 2.06                   |
| O7                | 1.54                   | O7                | 1.50                   |
| O8                | 2.05                   | O8                | 2.02                   |
| O9                | 2.10                   | O9                | 2.06                   |
| O10               | 1.88                   | O10               | 1.85                   |
| O11               | 1.84                   | O11               | 1.82                   |
| O12               | 1.77                   | O12               | 1.80                   |
| O13               | 1.89                   | O13               | 1.86                   |
| O14               | 2.06                   | O14               | 2.01                   |
| O15               | 1.55                   | O15               | 1.65                   |
| O16               | 1.18                   | O16               | 1.25                   |

**Note:**

- 1) The values of BVS calculations for O atoms in the 1.8-2.0, 1.0-1.2, and 0.2-0.4 ranges are indicative of non-, single- and double-protonation, respectively.
- 2) The O atoms with single-protonation were labeled by red.
- 3) Although the BVS values of O7 atoms in **1** and **3** are only 1.54 and 1.50, respectively, the two O atoms were assigned as non-protonation according to the charge balance of complexes **1** and **3**.

**Table S5.** Bond valence sum (BVS) calculations for determining of the oxidation states of the Dy and Ni atoms in **1** as well as the Y and Ni atoms in **3**.

| Ni and Dy atoms in <b>1</b> |      | Ni and Y atoms in <b>3</b> |      |
|-----------------------------|------|----------------------------|------|
| Dy1                         | 3.38 | Y1                         | 3.29 |
| Dy2                         | 3.27 | Y2                         | 3.24 |
| Ni1                         | 2.13 | Ni1                        | 2.14 |
| Ni2                         | 2.23 | Ni2                        | 2.21 |

**Table S6.** The possible geometries of oct-coordination metal centers and Deviation parameters from each ideal polyhedron for Dy1 and Dy2 in **1**.

| Point group | Geometry | Polyhedron                                     | CShM of Dy1 | CShM of Dy2 |
|-------------|----------|------------------------------------------------|-------------|-------------|
| $D_{8h}$    | OP-8     | Octagon                                        | 31.297      | 34.298      |
| $C_{7v}$    | HPY-8    | Heptagonal pyramid                             | 23.523      | 22.721      |
| $D_{6h}$    | HBPY-8   | Hexagonal bipyramid                            | 14.620      | 11.735      |
| $O_h$       | CU-8     | Cube                                           | 10.303      | 8.851       |
| $D_{4d}$    | SAPR-8   | Square antiprism                               | 2.495       | 2.898       |
| $D_{2d}$    | TDD-8    | Triangular dodecahedron                        | 1.859       | 2.862       |
| $D_{2d}$    | JGBF-8   | Johnson - Gyrobifastigium (J26)                | 12.139      | 11.024      |
| $D_{3h}$    | JETBPY-8 | Johnson - Elongated triangular bipyramid (J14) | 28.075      | 25.472      |
| $C_{2v}$    | JBTPR-8  | Johnson - Biaugmented trigonal prism (J50)     | 1.954       | 3.687       |
| $C_{2v}$    | BTPR-8   | Biaugmented trigonal prism                     | 1.571       | 3.314       |
| $D_{2d}$    | JSD-8    | Snub disphenoid (J84)                          | 4.375       | 5.706       |
| $T_d$       | TT-8     | Triakis tetrahedron                            | 10.994      | 9.596       |
| $D_{3h}$    | ETBPY-8  | Elongated trigonal bipyramid                   | 22.935      | 19.436      |

Note: The coordination geometries of Dy1 and Dy2 were labeled by red.

**Table S7.** The possible geometries of oct-coordination metal centers and Deviation parameters from each ideal polyhedron for Y1 and Y2 in **3**.

| Point group | Geometry | Polyhedron                                     | CShM of Dy1 | CShM of Dy2 |
|-------------|----------|------------------------------------------------|-------------|-------------|
| $D_{8h}$    | OP-8     | Octagon                                        | 32.071      | 34.315      |
| $C_{7v}$    | HPY-8    | Heptagonal pyramid                             | 23.576      | 22.870      |
| $D_{6h}$    | HBPY-8   | Hexagonal bipyramid                            | 14.848      | 11.659      |
| $O_h$       | CU-8     | Cube                                           | 10.400      | 8.751       |
| $D_{4d}$    | SAPR-8   | Square antiprism                               | 2.492       | 2.904       |
| $D_{2d}$    | TDD-8    | Triangular dodecahedron                        | 1.783       | 2.732       |
| $D_{2d}$    | JGBF-8   | Johnson - Gyrobifastigium (J26)                | 12.293      | 10.968      |
| $D_{3h}$    | JETBPY-8 | Johnson - Elongated triangular bipyramid (J14) | 27.874      | 25.699      |
| $C_{2v}$    | JBTPR-8  | Johnson - Biaugmented trigonal prism (J50)     | 1.930       | 3.591       |
| $C_{2v}$    | BTPR-8   | Biaugmented trigonal prism                     | 1.576       | 3.233       |
| $D_{2d}$    | JSD-8    | Snub disphenoid (J84)                          | 4.354       | 5.638       |
| $T_d$       | TT-8     | Triakis tetrahedron                            | 11.139      | 9.500       |
| $D_{3h}$    | ETBPY-8  | Elongated trigonal bipyramid                   | 23.372      | 19.740      |

Note: The coordination geometries of Y1 and Y2 were labeled by red.

**Table S8.** Best fitted parameters obtained from the fits of the Cole-Cole plots of **1** under a zero dc field by employing a double relaxation Debye model.

| $T$ (K) | $\chi_s$   | $\chi_{T1}$ | $\tau_1$ (s) | $\alpha_1$ | $\chi_{T2}$ | $\tau_2$ (s) | $\alpha_2$  | Residual |
|---------|------------|-------------|--------------|------------|-------------|--------------|-------------|----------|
| 1.90009 | 0.40984    | 3.23106     | 0.02487      | 0.28848    | 4.95093     | 0.00105      | 0.54468     | 0.00997  |
| 1.99988 | 0.45978    | 3.13235     | 0.01639      | 0.28029    | 4.5166      | 7.71413E-4   | 0.5163      | 0.01343  |
| 2.10001 | 0.53369    | 2.90923     | 0.01127      | 0.25272    | 4.16502     | 6.05971E-4   | 0.48122     | 0.01145  |
| 2.20016 | 0.5801     | 2.92971     | 0.0079       | 0.24804    | 3.70863     | 4.38632E-4   | 0.44734     | 0.0122   |
| 2.29999 | 0.59123    | 2.83022     | 0.00574      | 0.24175    | 3.45053     | 3.44225E-4   | 0.42597     | 0.01201  |
| 2.40005 | 0.63135    | 2.75819     | 0.00427      | 0.22917    | 3.15205     | 2.70412E-4   | 0.39448     | 0.01389  |
| 2.50001 | 0.64819    | 2.56422     | 0.00336      | 0.2155     | 3.05066     | 2.3542E-4    | 0.37841     | 0.01238  |
| 2.60004 | 0.6106     | 2.54921     | 0.00254      | 0.21153    | 2.82855     | 1.75794E-4   | 0.35535     | 0.01203  |
| 2.79979 | 0.38188    | 2.64895     | 0.00146      | 0.21701    | 2.49271     | 8.15123E-5   | 0.31911     | 0.01006  |
| 2.99986 | 1.12696E-5 | 2.62218     | 9.37412E-4   | 0.20676    | 2.47789     | 3.97407E-5   | 0.23927     | 0.0088   |
| 3.20007 | 2.92976E-5 | 2.5045      | 6.54413E-4   | 0.1941     | 2.22683     | 3.40941E-5   | 0.08868     | 0.00611  |
| 3.40008 | 7.60069E-5 | 2.26478     | 5.00215E-4   | 0.18088    | 2.15183     | 3.19149E-5   | 2.52009E-12 | 0.00459  |
| 3.60015 | 8.753E-5   | 1.86875     | 4.33037E-4   | 0.1569     | 2.25892     | 3.16414E-5   | 3.4375E-12  | 0.00489  |
| 3.79998 | 1.11162E-4 | 1.52945     | 3.84339E-4   | 0.13977    | 2.34364     | 3.13845E-5   | 6.5245E-12  | 0.00424  |

**Note:** the abnormal parameters were labeled by red.

**Table S9.** Best fitted parameters obtained from the fits of the Cole-Cole plots of **1** under a zero dc field by employing a single relaxation Debye model.

| $T$ (K) | $\chi_s$ | $\chi_T$ | $\tau$ (s) | $\alpha$ | Residual |
|---------|----------|----------|------------|----------|----------|
| 1.79993 | 0.69394  | 10.3555  | 0.01524    | 0.59455  | 0.20744  |
| 1.90009 | 0.822    | 9.35583  | 0.00888    | 0.55324  | 0.21842  |
| 1.99988 | 0.90878  | 8.62011  | 0.00569    | 0.51761  | 0.21645  |
| 2.10001 | 0.99431  | 7.96996  | 0.00387    | 0.48089  | 0.22209  |
| 2.20016 | 1.04546  | 7.49096  | 0.00283    | 0.45302  | 0.20771  |
| 2.29999 | 1.07714  | 7.07723  | 0.00212    | 0.42982  | 0.18089  |
| 2.40005 | 1.12553  | 6.70206  | 0.00165    | 0.40451  | 0.16928  |
| 2.50001 | 1.1547   | 6.39032  | 0.00131    | 0.38495  | 0.14555  |
| 2.60004 | 1.17071  | 6.09072  | 0.00105    | 0.36647  | 0.12855  |
| 2.79979 | 1.2096   | 5.5883   | 7.09566E-4 | 0.33543  | 0.08993  |
| 2.99986 | 1.25516  | 5.14509  | 5.05331E-4 | 0.30469  | 0.07129  |
| 3.20007 | 1.27291  | 4.76411  | 3.71288E-4 | 0.27984  | 0.05278  |
| 3.40008 | 1.27836  | 4.4418   | 2.82113E-4 | 0.26223  | 0.03813  |
| 3.60015 | 1.26345  | 4.14971  | 2.1714E-4  | 0.24754  | 0.03243  |
| 3.79998 | 1.20621  | 3.8924   | 1.6638E-4  | 0.23927  | 0.02557  |

**Table S10.** Best fitted parameters obtained from the fits of the Cole-Cole plots of **2** under a zero dc field by employing a single relaxation Debye model.

| $T$ (K) | $\chi_s$ | $\chi_T$ | $\tau$ (s) | $\alpha$ | Residual   |
|---------|----------|----------|------------|----------|------------|
| 1.81989 | 0.37678  | 0.69556  | 0.00473    | 0.55952  | 9.61126E-5 |
| 1.89994 | 0.36853  | 0.67615  | 0.00477    | 0.56131  | 3.95806E-5 |
| 2.00035 | 0.35864  | 0.6486   | 0.0042     | 0.55768  | 4.57287E-5 |
| 2.10006 | 0.34896  | 0.6203   | 0.00364    | 0.55226  | 4.62351E-5 |
| 2.2005  | 0.34087  | 0.59824  | 0.00329    | 0.54934  | 5.5583E-5  |
| 2.30164 | 0.33301  | 0.57626  | 0.00293    | 0.54512  | 6.28339E-5 |
| 2.40051 | 0.32588  | 0.55607  | 0.00265    | 0.54     | 7.29921E-5 |
| 2.59971 | 0.31436  | 0.51911  | 0.00226    | 0.52972  | 5.0508E-5  |
| 2.79999 | 0.30378  | 0.48648  | 0.00196    | 0.51604  | 5.00905E-5 |
| 3.00077 | 0.29351  | 0.45758  | 0.00173    | 0.50449  | 4.92126E-5 |
| 3.29985 | 0.28029  | 0.41984  | 0.00149    | 0.48405  | 3.98881E-5 |
| 3.69867 | 0.26469  | 0.37792  | 0.00131    | 0.452    | 3.61811E-5 |
| 4.09854 | 0.24829  | 0.34347  | 0.00114    | 0.43009  | 3.19318E-5 |
| 4.50162 | 0.23506  | 0.31454  | 0.00106    | 0.40284  | 2.20067E-5 |
| 4.99931 | 0.2188   | 0.28423  | 9.73097E-4 | 0.37506  | 1.39815E-5 |
| 5.50022 | 0.20396  | 0.25938  | 8.98321E-4 | 0.36091  | 1.01571E-5 |

**Table S11.** Best fitted parameters obtained from the fits of the Cole-Cole plots of **2** under a 1000 Oe dc field by employing a single relaxation Debye model.

| $T$ (K) | $\chi_s$ | $\chi_T$ | $\tau$ (s) | $\alpha$ | Residual   |
|---------|----------|----------|------------|----------|------------|
| 1.82003 | 0.36288  | 0.61035  | 0.00457    | 0.50803  | 8.81653E-5 |
| 1.99984 | 0.35492  | 0.58843  | 0.00492    | 0.50722  | 1.39485E-4 |
| 2.19993 | 0.33649  | 0.55963  | 0.00411    | 0.5154   | 1.66303E-4 |
| 2.40103 | 0.32228  | 0.531    | 0.00346    | 0.52186  | 9.06396E-5 |
| 2.60039 | 0.31134  | 0.50158  | 0.00292    | 0.51392  | 8.53909E-5 |
| 2.80036 | 0.29703  | 0.47542  | 0.00233    | 0.51713  | 9.60116E-5 |
| 2.99964 | 0.28591  | 0.44908  | 0.00187    | 0.51414  | 5.50132E-5 |
| 3.29902 | 0.27504  | 0.41646  | 0.0017     | 0.49855  | 6.39142E-5 |
| 3.59957 | 0.2636   | 0.38767  | 0.00155    | 0.49136  | 6.99034E-5 |
| 3.89838 | 0.25585  | 0.3574   | 0.00133    | 0.43636  | 3.05202E-5 |
| 4.20036 | 0.2439   | 0.33455  | 0.00118    | 0.43654  | 2.36718E-5 |
| 4.49894 | 0.23525  | 0.31655  | 0.00122    | 0.41817  | 4.12261E-5 |
| 4.79993 | 0.22525  | 0.29681  | 0.0011     | 0.40075  | 2.24541E-5 |
| 5.09741 | 0.21596  | 0.28062  | 0.00103    | 0.39309  | 1.43834E-5 |
| 5.39735 | 0.20752  | 0.26503  | 9.5265E-4  | 0.38056  | 8.53606E-6 |
| 5.69935 | 0.19912  | 0.25088  | 8.79362E-4 | 0.36583  | 7.26453E-6 |
| 5.99802 | 0.19263  | 0.23925  | 9.02599E-4 | 0.33528  | 9.93704E-6 |



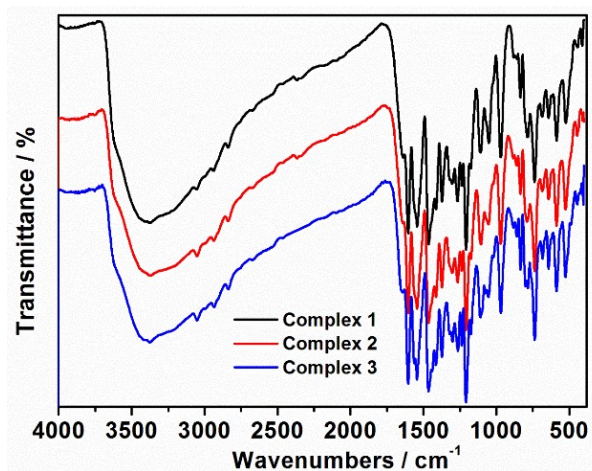

Figure S1. IR spectra of complexes 1-3.

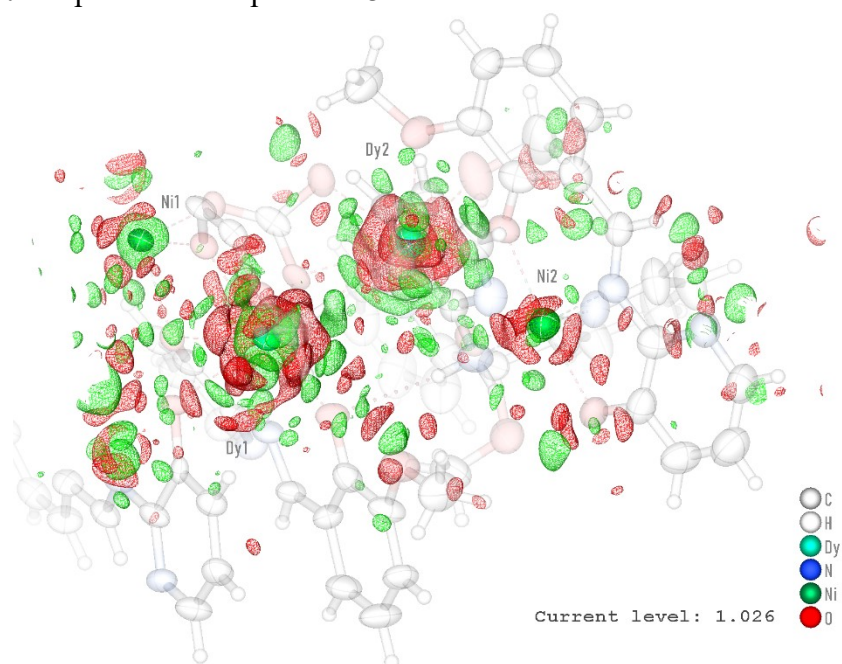

Figure S2. The large residuals around metal ions in 1.

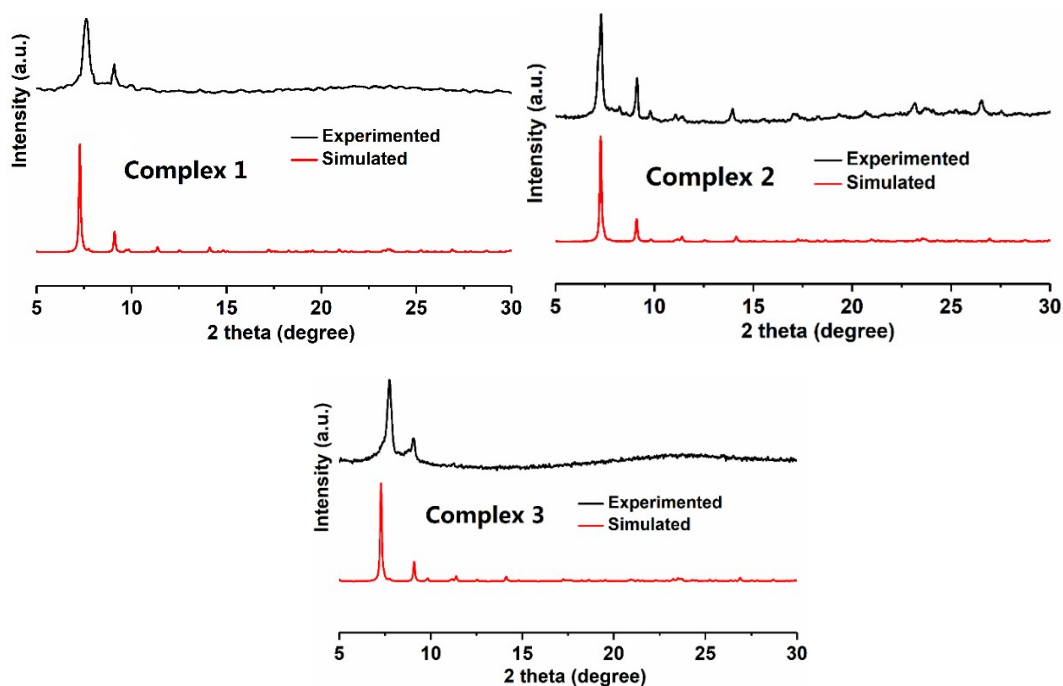

**Figure S3.** PXRD patterns and simulated patterns generated from single crystal diffraction data for complexes **1-3**.

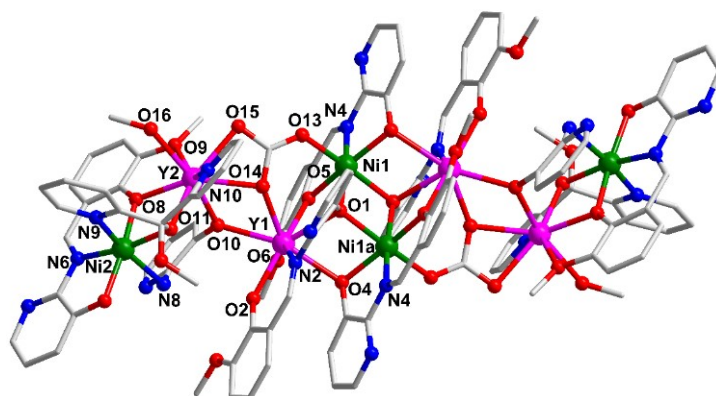

**Figure S4.** Crystal structure of **3**, in which Hydrogen atoms were omitted for clarity. Symmetry code:  $a = 0.5 - x, 0.5 - y, 1 - z$ .

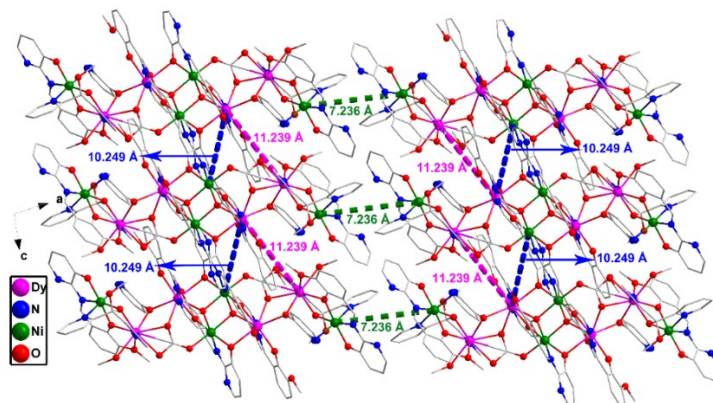

**Figure S5.** The plot viewing along  $b$  direction of crystal cell to show the distances of  $\text{Dy}^{\text{III}} \cdots \text{Dy}^{\text{III}}$  (pink),  $\text{Ni}^{\text{II}} \cdots \text{Ni}^{\text{II}}$  (green) and  $\text{Dy}^{\text{III}} \cdots \text{Ni}^{\text{II}}$  (blue) in the neighboring molecules of **1**.

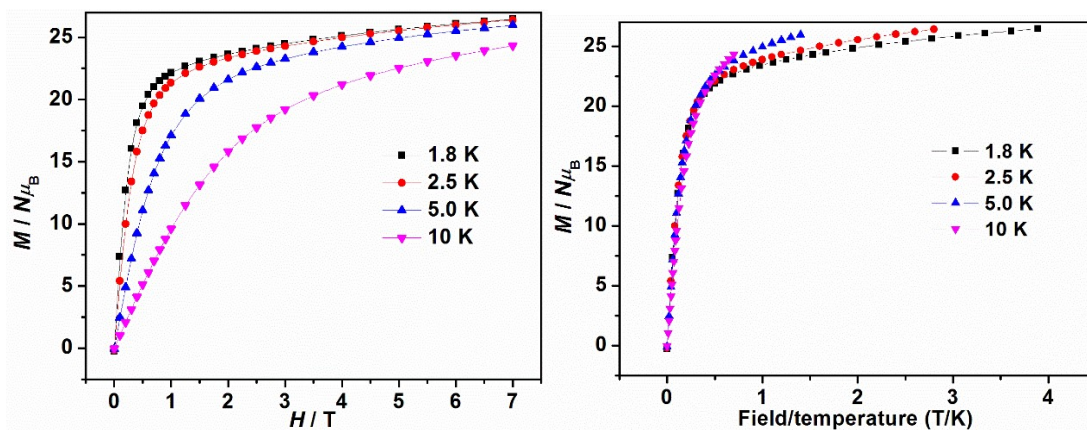

**Figure S6.** The plots of  $M$  vs.  $H$  (left) and  $M$  vs.  $H/T$  (right) for **1** measured in the range of 0-7 T and 1.8-10 K.

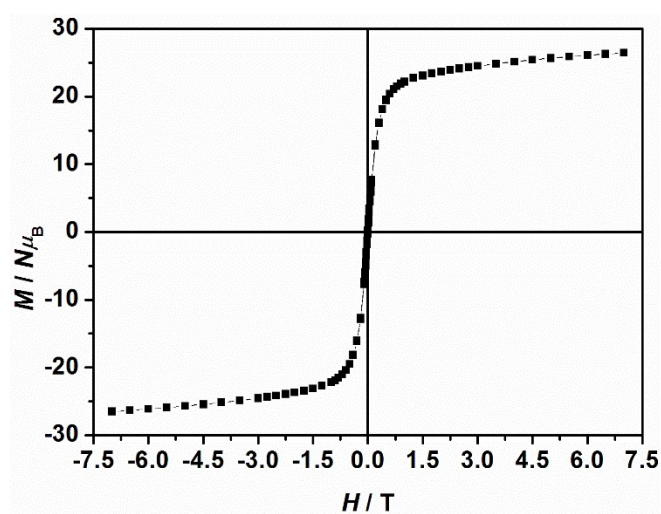

**Figure S7.** Hysteresis loops of **1** measured at 1.8 K (the field sweep rate is  $0.02 \text{ T s}^{-1}$ ).

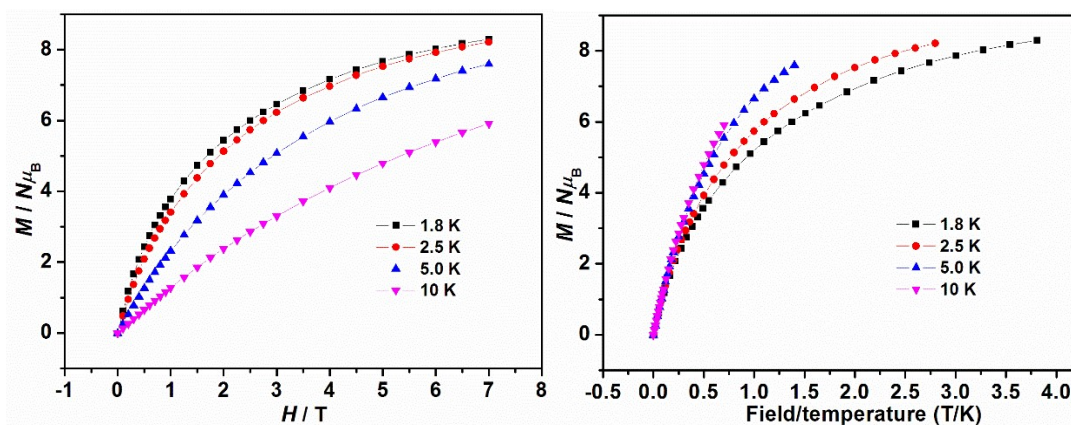

**Figure S8.** The plots of  $M$  vs.  $H$  (left) and  $M$  vs.  $H/T$  (right) for **2** measured in the range of 0-7 T and 1.8-10 K.



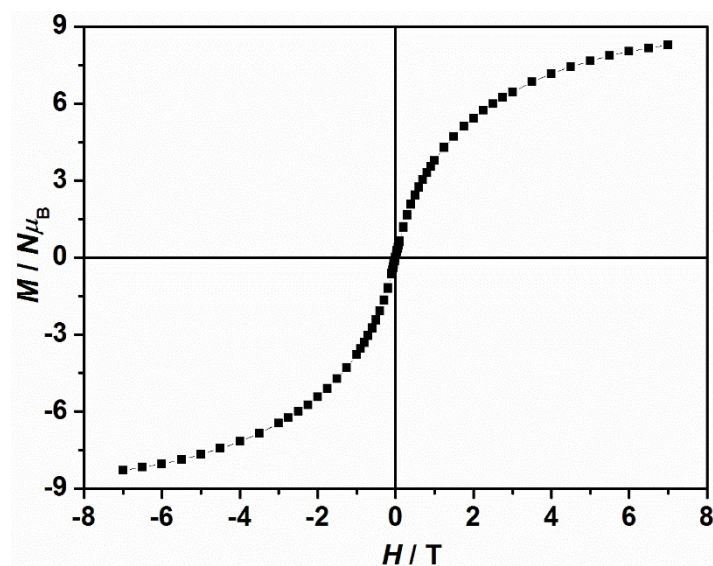

Figure S9. Hysteresis loops of **2** measured at 1.8 K (the field sweep rate is  $0.02 \text{ T s}^{-1}$ ).

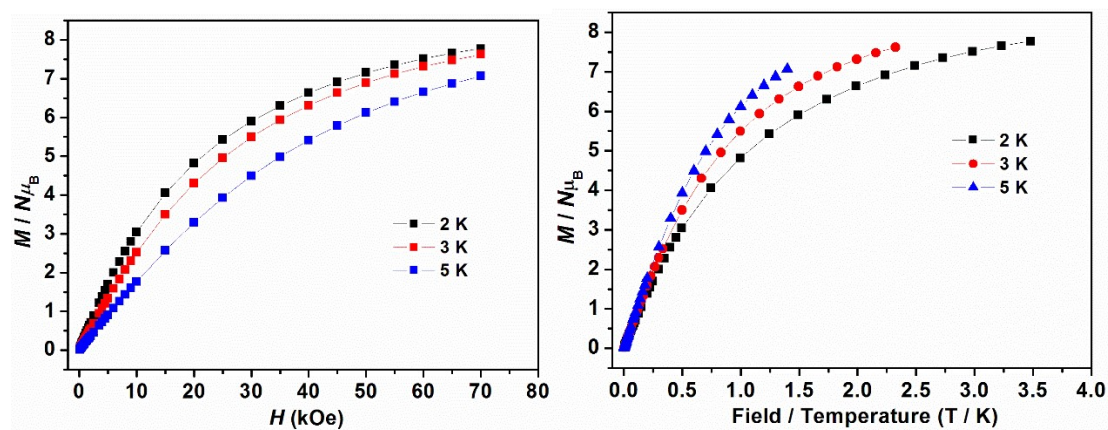

Figure S10. The plots of  $M$  vs.  $H$  (left) and  $M$  vs.  $H/T$  (right) for **3** measured in the range of 0-7 T and 1.8-10 K.

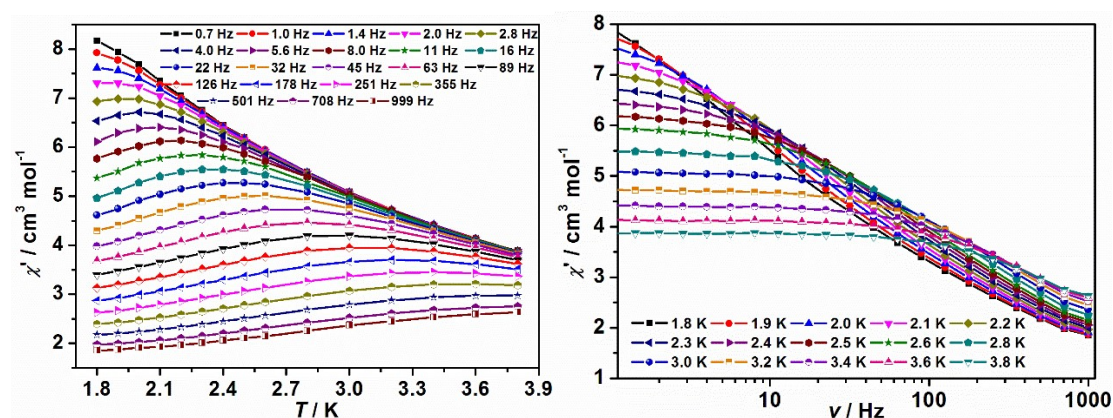

Figure S11. The plots of in-phase ( $\chi'$ ) ac susceptibilities vs.  $T$  (left,  $T$  represents temperature) and  $\chi'$  vs.  $\nu$  (right,  $\nu$  represents frequency) of **1** measured under a zero dc field.

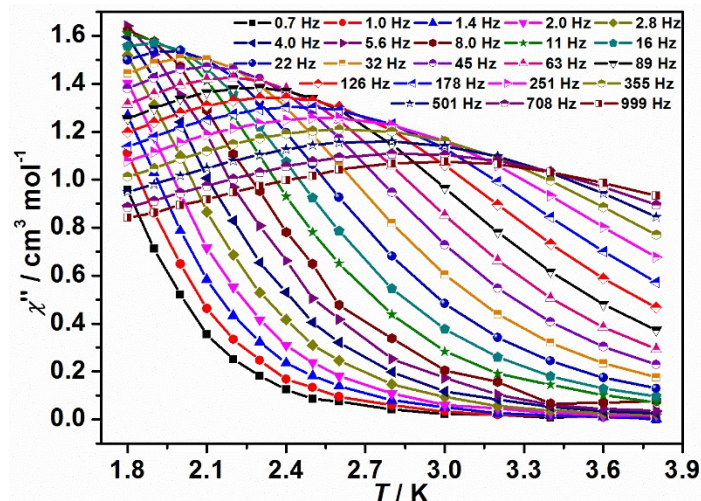

**Figure S12.** The temperature dependence of the out-of-phase ( $\chi''$ ) ac susceptibilities of **1** measured under a zero dc field.

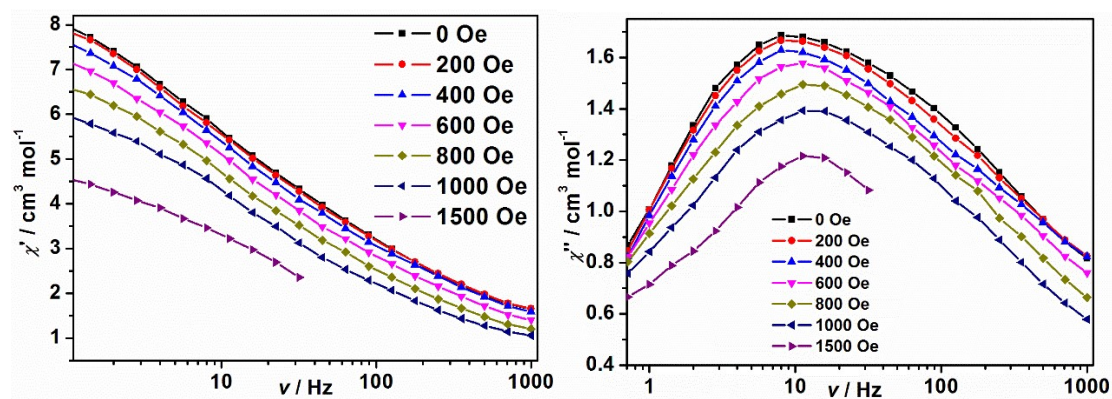

**Figure S13.** Frequency dependence of  $\chi'$  (left) and  $\chi''$  (right) ac signals for **1** under different dc fields at 1.8 K.

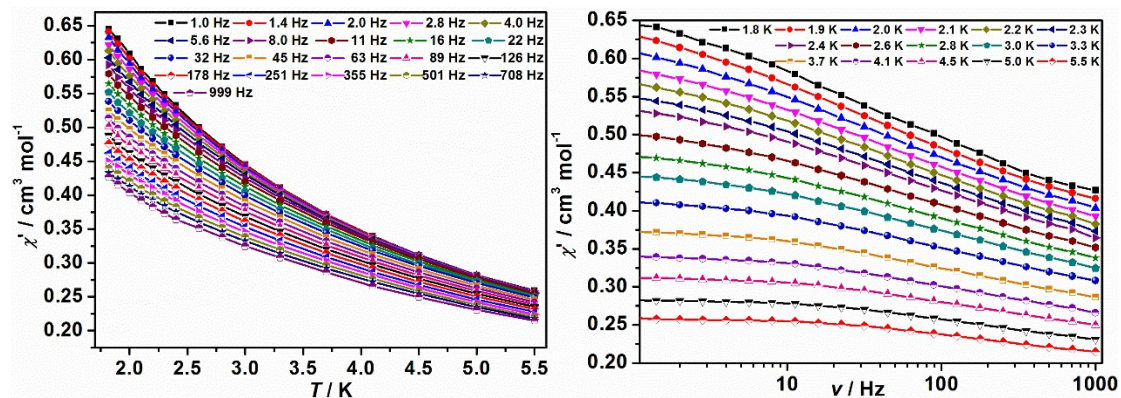

**Figure S14.** The plots of  $\chi'$  vs.  $T$  (left) and  $\chi'$  vs.  $\nu$  (right) of **2** measured under a zero dc field.



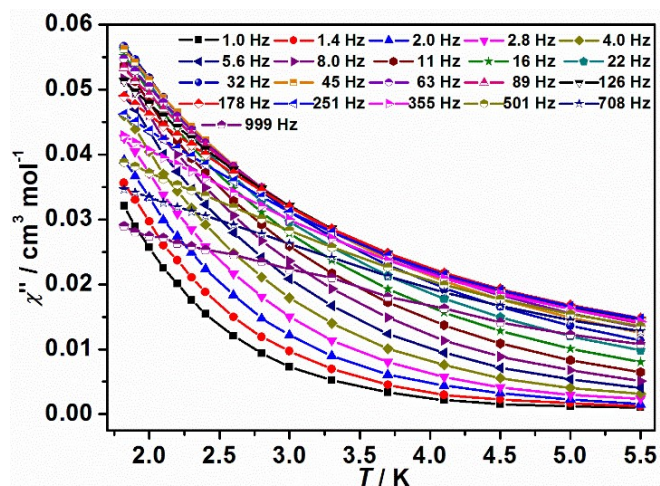

Figure S15. The temperature dependence of  $\chi''$  of **2** measured under a zero dc field.

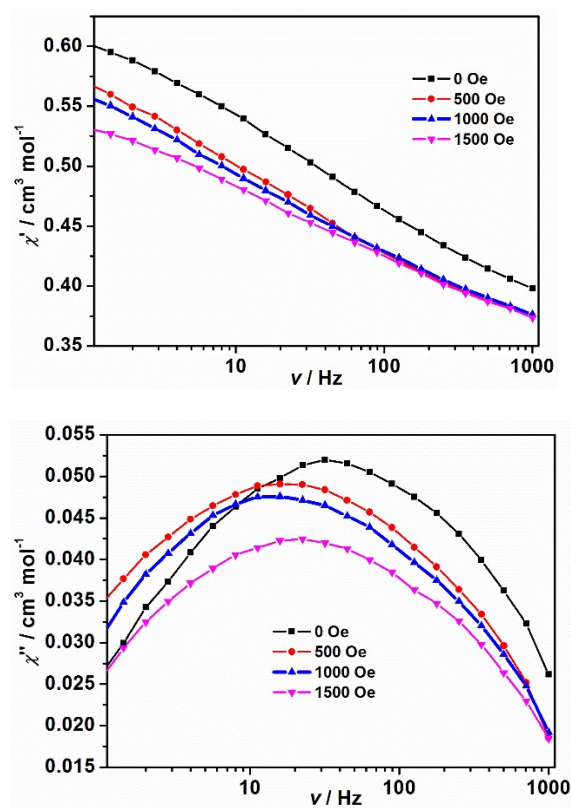

Figure S16. Frequency dependence of  $\chi'$  (left) and  $\chi''$  (right) ac signals for **2** under different dc fields at 1.8 K.

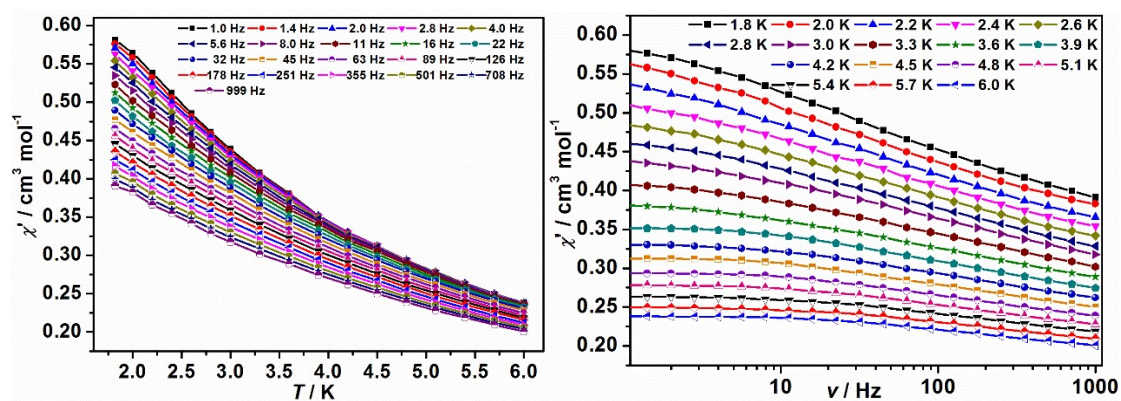

**Figure S17.** The plots of  $\chi'$  vs.  $T$  (left) and  $\chi'$  vs.  $\nu$  (right) of **2** measured under a 1000 Oe dc field.

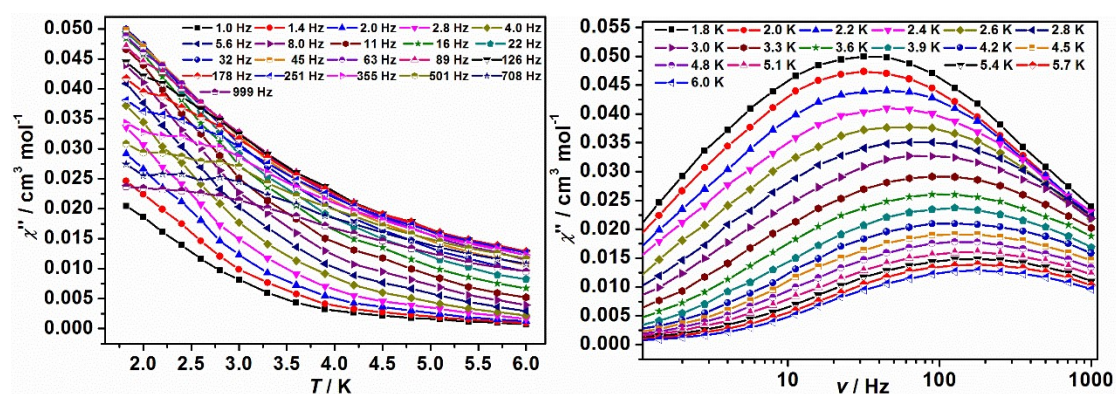

**Figure S18.** The plots of  $\chi''$  vs.  $T$  (left) and  $\chi''$  vs.  $\nu$  (right) of **2** measured under a 1000 Oe dc field.

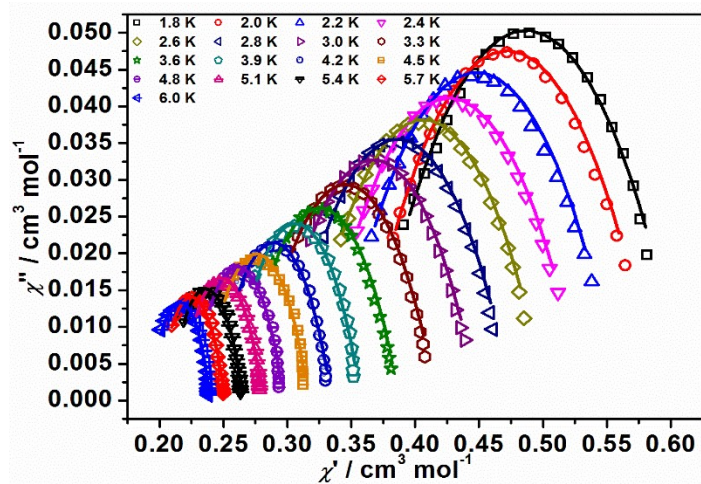

**Figure S19.** Cole-Cole plots of **2** under a 1000 Oe dc field, in which the solid lines represent the fitted results by the single relaxation Debye model.

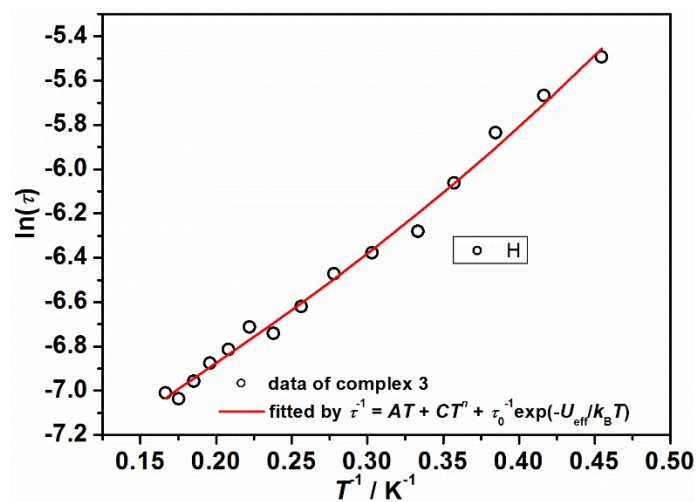

**Figure S20.** The plots of  $\ln(\tau)$  vs.  $T^{-1}$  of **2** under a 1000 Oe dc field; the red solid line represents the fit of relaxation data by employing the equation of  $\tau^{-1} = AT + \tau_0^{-1}\exp(-U_{\text{eff}}/k_B T) + \tau_{\text{QTM}}^{-1}$ .
